# Supplementary material for: The impact of local genomic properties on the evolutionary fate of genes
Source: eLife. 2023 May 24;12:e82290. doi: 10.7554/eLife.82290 (PMC10208646; doi:10.7554/eLife.82290)
Supplement: Figure 3—figure supplement 1—source data 1. [file elife-82290-fig3-figsupp1-data1.xlsx]

## Sheet: Sheet1
	3 species	1 or 2 species
Elusive genes	144	146
Non-elusive genes	6674	1051
