# Supplementary material for: The impact of local genomic properties on the evolutionary fate of genes
Source: eLife. 2023 May 24;12:e82290. doi: 10.7554/eLife.82290 (PMC10208646; doi:10.7554/eLife.82290)
Supplement: Supplementary file 1. — (a) Supplementary Table S1. Vertebrate species used for creating gene phylogenies. (b) Supplementary Table S3. ENCODE accession ID list used for epigenomic analyses. (c) Supplementary Table S4. RNA-seq and ATAC-seq samples of non-mammalian vertebrates. [file elife-82290-supp1.xlsx]

## Sheet: Table_S1-supplementary_file_1a
Supplementary Table S1. Vertebrate species used for creating gene phylogenies.
Species	Abbrebiation	NCBI_Taxonomy_ID	Vertebrate_group	Representative_Taxonomy	Representative_Upper_Taxonomy	BuscoVRT_complete	BuscoVRT_missing	BuscoCVG_complete	BuscoCVG_missing	Annotation_source	Taxonomy
Danio rerio	Danrer	7955	Fishes	.	.	99.19	0.43	100	0	RefSeq_GCF_000002035.6;Ensembl_92	Vertebrata; Euteleostomi; Actinopterygii; Neopterygii; Teleostei; Ostariophysi; Cypriniformes; Cyprinidae; Danio
Homo sapiens	Homsap	9606	Mammals	Hominoidea	.	99.73	0.12	100	0	RefSeq_GCF_000001405.38;Ensembl_92	Vertebrata; Euteleostomi; Mammalia; Eutheria; Euarchontoglires; Primates; Haplorrhini; Catarrhini; Hominidae; Homo
Mus musculus	Musmus	10090	Mammals	Myomorpha(Myodonta)	Myomorpha-Castorimorpha clade;Myomorpha-Castorimorpha-Sciuromorpha clade;Rodentia	99.88	0.12	100	0	RefSeq_GCF_000001635.26;Ensembl_92	Vertebrata; Euteleostomi; Mammalia; Eutheria; Euarchontoglires; Glires; Rodentia; Myomorpha; Muroidea; Muridae; Murinae; Mus; Mus
Takifugu rubripes	Takrub	31033	Fishes	.	.	97.56	0.77	96.57	1.29	RefSeq_GCF_000180615.1;Ensembl_92	Vertebrata; Euteleostomi; Actinopterygii; Neopterygii; Teleostei; Neoteleostei; Acanthomorphata; Eupercaria; Tetraodontiformes; Tetradontoidea; Tetraodontidae; Takifugu
Rattus norvegicus	Ratnor	10116	Mammals	Myomorpha(Myodonta)	Myomorpha-Castorimorpha clade;Myomorpha-Castorimorpha-Sciuromorpha clade;Rodentia	99.5	0.19	99.14	0.43	RefSeq_GCF_000001895.5;Ensembl_92	Vertebrata; Euteleostomi; Mammalia; Eutheria; Euarchontoglires; Glires; Rodentia; Myomorpha; Muroidea; Muridae; Murinae; Rattus
Sus scrofa	Susscr	9823	Mammals	Cetartiodactyla	Laurasiatheria	99.77	0.12	99.57	0.43	RefSeq_GCF_000003025.6;Ensembl_92	Vertebrata; Euteleostomi; Mammalia; Eutheria; Laurasiatheria; Cetartiodactyla; Suina; Suidae; Sus
Felis catus	Felcat	9685	Mammals	Carnivora	Laurasiatheria	99.77	0.04	99.14	0.43	RefSeq_GCF_000181335.3;Ensembl_92	Vertebrata; Euteleostomi; Mammalia; Eutheria; Laurasiatheria; Carnivora; Feliformia; Felidae; Felinae; Felis
Xenopus tropicalis	Xentro	8364	Amphibians	.	.	98.38	1.01	100	0	RefSeq_GCF_000004195.3;Ensembl_92;Xenbase_XENTR_9.1	Vertebrata; Euteleostomi; Amphibia; Batrachia; Anura; Pipoidea; Pipidae; Xenopodinae; Xenopus; Silurana
Xenopus laevis	Xenlae	8355	Amphibians	.	.	98.65	0.81	98.71	0	RefSeq_GCF_001663975.1	Vertebrata; Euteleostomi; Amphibia; Batrachia; Anura; Pipoidea; Pipidae; Xenopodinae; Xenopus; Xenopus
Bos taurus	Bostau	9913	Mammals	Cetartiodactyla	Laurasiatheria	99.42	0.12	100	0	RefSeq_GCF_000003055.6;Ensembl_92	Vertebrata; Euteleostomi; Mammalia; Eutheria; Laurasiatheria; Cetartiodactyla; Ruminantia; Pecora; Bovidae; Bovinae; Bos
Ovis aries	Oviari	9940	Mammals	Cetartiodactyla	Laurasiatheria	98.61	0.23	98.71	0.86	RefSeq_GCF_000298735.2;Ensembl_92	Vertebrata; Euteleostomi; Mammalia; Eutheria; Laurasiatheria; Cetartiodactyla; Ruminantia; Pecora; Bovidae; Caprinae; Ovis
Canis familiaris	Canfam	9615	Mammals	Carnivora	Laurasiatheria	99.34	0.15	99.57	0.43	RefSeq_GCF_000002285.3;Ensembl_92	Vertebrata; Euteleostomi; Mammalia; Eutheria; Laurasiatheria; Carnivora; Caniformia; Canidae; Canis
Gallus gallus	Galgal	9031	Birds	Galloanserae	.	99.42	0.15	100	0	RefSeq_GCF_000002315.4;Ensembl_92	Vertebrata; Euteleostomi; Archelosauria; Archosauria; Dinosauria; Saurischia; Theropoda; Coelurosauria; Aves; Neognathae; Galloanserae; Galliformes; Phasianidae; Phasianinae; Gallus
Meleagris gallopavo	Melgal	9103	Birds	Galloanserae	.	96.95	0.35	98.71	0	RefSeq_GCF_000146605.2;Ensembl_92	Vertebrata; Euteleostomi; Archelosauria; Archosauria; Dinosauria; Saurischia; Theropoda; Coelurosauria; Aves; Neognathae; Galloanserae; Galliformes; Phasianidae; Meleagridinae; Meleagris
Coturnix japonica	Cotjap	93934	Birds	Galloanserae	.	99.23	0.15	99.57	0	RefSeq_GCF_001577835.1	Vertebrata; Euteleostomi; Archelosauria; Archosauria; Dinosauria; Saurischia; Theropoda; Coelurosauria; Aves; Neognathae; Galloanserae; Galliformes; Phasianidae; Perdicinae; Coturnix
Struthio camelus australis	Strcam	441894	Birds	.	.	95.55	0.62	94.85	1.72	RefSeq_GCF_000698965.1	Vertebrata; Euteleostomi; Archelosauria; Archosauria; Dinosauria; Saurischia; Theropoda; Coelurosauria; Aves; Palaeognathae; Struthioniformes; Struthionidae; Struthio
Falco peregrinus	Falper	8954	Birds	Neoaves	.	96.02	0.46	96.57	0	RefSeq_GCF_000337955.1	Vertebrata; Euteleostomi; Archelosauria; Archosauria; Dinosauria; Saurischia; Theropoda; Coelurosauria; Aves; Neognathae; Falconiformes; Falconidae; Falco
Ictalurus punctatus	Ictpun	7998	Fishes	.	.	92.38	2.09	97.85	2.15	RefSeq_GCF_001660625.1	Vertebrata; Euteleostomi; Actinopterygii; Neopterygii; Teleostei; Ostariophysi; Siluriformes; Ictaluridae; Ictalurus
Equus caballus	Equcab	9796	Mammals	Perissodactyla	Laurasiatheria	99.96	0	99.57	0.43	RefSeq_GCF_002863925.1;Ensembl_92	Vertebrata; Euteleostomi; Mammalia; Eutheria; Laurasiatheria; Perissodactyla; Equidae; Equus
Oreochromis niloticus	Orenil	8128	Fishes	.	.	99.77	0.08	100	0	RefSeq_GCF_001858045.1;Ensembl_92	Vertebrata; Euteleostomi; Actinopterygii; Neopterygii; Teleostei; Neoteleostei; Acanthomorphata; Ovalentaria; Cichlomorphae; Cichliformes; Cichlidae; African cichlids; Pseudocrenilabrinae; Oreochromini; Oreochromis
Macaca mulatta	Macmul	9544	Mammals	Cercopithecoidea	.	99.54	0.15	98.28	1.29	RefSeq_GCF_000772875.2;Ensembl_92	Vertebrata; Euteleostomi; Mammalia; Eutheria; Euarchontoglires; Primates; Haplorrhini; Catarrhini; Cercopithecidae; Cercopithecinae; Macaca
Monodelphis domestica	Mondom	13616	Mammals	Marsupialia	.	98.34	0.73	99.57	0	RefSeq_GCF_000002295.2;Ensembl_92	Vertebrata; Euteleostomi; Mammalia; Metatheria; Didelphimorphia; Didelphidae; Monodelphis
Loxodonta africana	Loxafr	9785	Mammals	Afrotheria	.	99.65	0	99.57	0.43	RefSeq_GCF_000001905.1;Ensembl_92	Vertebrata; Euteleostomi; Mammalia; Eutheria; Afrotheria; Proboscidea; Elephantidae; Loxodonta
Cavia porcellus	Cavpor	10141	Mammals	Hystricognathi	Rodentia	98.8	0.23	99.14	0	RefSeq_GCF_000151735.1;Ensembl_92	Vertebrata; Euteleostomi; Mammalia; Eutheria; Euarchontoglires; Glires; Rodentia; Hystricomorpha; Caviidae; Cavia
Echinops telfairi	Echtel	9371	Mammals	Afrotheria	.	97.68	0.35	98.28	0	RefSeq_GCF_000313985.1;Ensembl_92	Vertebrata; Euteleostomi; Mammalia; Eutheria; Afrotheria; Tenrecidae; Tenrecinae; Echinops
Dasypus novemcinctus	Dasnov	9361	Mammals	.	.	97.83	0.23	97.85	0.86	RefSeq_GCF_000208655.1;Ensembl_92	Vertebrata; Euteleostomi; Mammalia; Eutheria; Xenarthra; Cingulata; Dasypodidae; Dasypus
Sorex araneus	Sorara	42254	Mammals	Eulipotyphla	Laurasiatheria	97.22	0.39	99.14	0	RefSeq_GCF_000181275.1;Ensembl_92	Vertebrata; Euteleostomi; Mammalia; Eutheria; Laurasiatheria; Insectivora; Soricidae; Soricinae; Sorex
Erinaceus europaeus	Erieur	9365	Mammals	Eulipotyphla	Laurasiatheria	97.99	0.43	99.14	0.43	RefSeq_GCF_000296755.1;Ensembl_92	Vertebrata; Euteleostomi; Mammalia; Eutheria; Laurasiatheria; Insectivora; Erinaceidae; Erinaceinae; Erinaceus
Pongo abelii	Ponabe	9601	Mammals	Hominoidea	.	99.69	0.08	99.14	0.43	RefSeq_GCF_002880775.1;Ensembl_92	Vertebrata; Euteleostomi; Mammalia; Eutheria; Euarchontoglires; Primates; Haplorrhini; Catarrhini; Hominidae; Pongo
Taeniopygia guttata	Taegut	59729	Birds	Neoaves	.	97.49	0.46	99.57	0	RefSeq_GCF_000151805.1;Ensembl_92	Vertebrata; Euteleostomi; Archelosauria; Archosauria; Dinosauria; Saurischia; Theropoda; Coelurosauria; Aves; Neognathae; Passeriformes; Passeroidea; Estrildidae; Estrildinae; Taeniopygia
Salmo salar	Salsal	8030	Fishes	.	.	98.26	0.58	97.42	0.43	RefSeq_GCF_000233375.1	Vertebrata; Euteleostomi; Actinopterygii; Neopterygii; Teleostei; Protacanthopterygii; Salmoniformes; Salmonidae; Salmoninae; Salmo
Papio anubis	Papanu	9555	Mammals	Cercopithecoidea	.	99.23	0.08	99.14	0.86	RefSeq_GCF_000264685.3;Ensembl_92	Vertebrata; Euteleostomi; Mammalia; Eutheria; Euarchontoglires; Primates; Haplorrhini; Catarrhini; Cercopithecidae; Cercopithecinae; Papio
Callithrix jacchus	Caljac	9483	Mammals	Platyrrhini	.	99.65	0.08	100	0	RefSeq_GCF_000004665.1;Ensembl_92	Vertebrata; Euteleostomi; Mammalia; Eutheria; Euarchontoglires; Primates; Haplorrhini; Platyrrhini; Cebidae; Callitrichinae; Callithrix; Callithrix
Otolemur garnettii	Otogar	30611	Mammals	Strepsirhini	.	99.03	0.12	100	0	RefSeq_GCF_000181295.1;Ensembl_92	Vertebrata; Euteleostomi; Mammalia; Eutheria; Euarchontoglires; Primates; Strepsirrhini; Lorisiformes; Galagidae; Otolemur
Ictidomys tridecemlineatus	Icttri	43179	Mammals	Sciuromorpha	Myomorpha-Castorimorpha-Sciuromorpha clade;Rodentia	98.26	0.39	100	0	RefSeq_GCF_000236235.1;Ensembl_92	Vertebrata; Euteleostomi; Mammalia; Eutheria; Euarchontoglires; Glires; Rodentia; Sciuromorpha; Sciuridae; Xerinae; Marmotini; Ictidomys
Nomascus leucogenys	Nomleu	61853	Mammals	Hominoidea	.	97.72	0.27	100	0	RefSeq_GCF_000146795.2;Ensembl_92	Vertebrata; Euteleostomi; Mammalia; Eutheria; Euarchontoglires; Primates; Haplorrhini; Catarrhini; Hylobatidae; Nomascus
Oryzias latipes	Orylat	8090	Fishes	.	.	98.96	0.7	99.14	0.43	RefSeq_GCF_002234675.1;Ensembl_92	Vertebrata; Euteleostomi; Actinopterygii; Neopterygii; Teleostei; Neoteleostei; Acanthomorphata; Ovalentaria; Atherinomorphae; Beloniformes; Adrianichthyidae; Oryziinae; Oryzias
Callorhinchus milii	Calmil	7868	Chondrichthyans	.	.	97.06	1.51	98.28	1.29	RefSeq_GCF_000165045.1	Vertebrata; Chondrichthyes; Holocephali; Chimaeriformes; Callorhinchidae; Callorhinchus
Anolis carolinensis	Anocar	28377	Reptiles	Toxicofera	.	96.67	2.24	99.57	0.43	RefSeq_GCF_000090745.1;Ensembl_92	Vertebrata; Euteleostomi; Lepidosauria; Squamata; Bifurcata; Unidentata; Episquamata; Toxicofera; Iguania; Dactyloidae; Anolis
Fundulus heteroclitus	Funhet	8078	Fishes	.	.	98.84	0.54	99.14	0.86	RefSeq_GCF_000826765.1	Vertebrata; Euteleostomi; Actinopterygii; Neopterygii; Teleostei; Neoteleostei; Acanthomorphata; Ovalentaria; Atherinomorphae; Cyprinodontiformes; Fundulidae; Fundulus
Pteropus vampyrus	Ptevam	132908	Mammals	Chiroptera	Laurasiatheria	98.69	0.12	99.14	0	RefSeq_GCF_000151845.1;Ensembl_92	Vertebrata; Euteleostomi; Mammalia; Eutheria; Laurasiatheria; Chiroptera; Megachiroptera; Pteropodidae; Pteropodinae; Pteropus
Tursiops truncatus	Turtru	9739	Mammals	Cetartiodactyla	Laurasiatheria	98.8	0.08	99.14	0	RefSeq_GCF_001922835.1;Ensembl_92	Vertebrata; Euteleostomi; Mammalia; Eutheria; Laurasiatheria; Cetartiodactyla; Cetacea; Odontoceti; Delphinidae; Tursiops
Ochotona princeps	Ochpri	9978	Mammals	.	.	98.26	0.23	98.71	0.86	RefSeq_GCF_000292845.1;Ensembl_92	Vertebrata; Euteleostomi; Mammalia; Eutheria; Euarchontoglires; Glires; Lagomorpha; Ochotonidae; Ochotona
Dipodomys ordii	Dipord	10020	Mammals	Castorimorpha	Myomorpha-Castorimorpha clade;Myomorpha-Castorimorpha-Sciuromorpha clade;Rodentia	96.67	0.54	97.85	0.43	RefSeq_GCF_000151885.1;Ensembl_92	Vertebrata; Euteleostomi; Mammalia; Eutheria; Euarchontoglires; Glires; Rodentia; Castorimorpha; Heteromyidae; Dipodomyinae; Dipodomys
Macaca fascicularis	Macfas	9541	Mammals	Cercopithecoidea	.	99.27	0.08	99.57	0.43	RefSeq_GCF_000364345.1;Ensembl_92	Vertebrata; Euteleostomi; Mammalia; Eutheria; Euarchontoglires; Primates; Haplorrhini; Catarrhini; Cercopithecidae; Cercopithecinae; Macaca
Galeopterus variegatus	Galvar	482537	Mammals	.	.	93.54	0.54	95.28	0	RefSeq_GCF_000696425.1	Vertebrata; Euteleostomi; Mammalia; Eutheria; Euarchontoglires; Dermoptera; Cynocephalidae; Galeopterus
Microcebus murinus	Micmur	30608	Mammals	Strepsirhini	.	98.84	0.23	97.42	0.86	RefSeq_GCF_000165445.2	Vertebrata; Euteleostomi; Mammalia; Eutheria; Euarchontoglires; Primates; Strepsirrhini; Lemuriformes; Cheirogaleidae; Microcebus
Vicugna pacos	Vicpac	30538	Mammals	Cetartiodactyla	Laurasiatheria	98.26	0.27	100	0	RefSeq_GCF_000164845.2;Ensembl_92	Vertebrata; Euteleostomi; Mammalia; Eutheria; Laurasiatheria; Cetartiodactyla; Tylopoda; Camelidae; Vicugna
Gorilla gorilla gorilla	Gorgor	9595	Mammals	Hominoidea	.	97.56	0.08	100	0	RefSeq_GCF_000151905.2;Ensembl_92	Vertebrata; Euteleostomi; Mammalia; Eutheria; Euarchontoglires; Primates; Haplorrhini; Catarrhini; Hominidae; Gorilla
Maylandia zebra	Mayzeb	106582	Fishes	.	.	99.38	0.31	98.28	0.86	RefSeq_GCF_000238955.1	Vertebrata; Euteleostomi; Actinopterygii; Neopterygii; Teleostei; Neoteleostei; Acanthomorphata; Ovalentaria; Cichlomorphae; Cichliformes; Cichlidae; African cichlids; Pseudocrenilabrinae; Haplochromini; Maylandia; Maylandia zebra complex
Nothobranchius furzeri	Notfur	105023	Fishes	.	.	98.41	0.58	99.57	0.43	RefSeq_GCF_001465895.1	Vertebrata; Euteleostomi; Actinopterygii; Neopterygii; Teleostei; Neoteleostei; Acanthomorphata; Ovalentaria; Atherinomorphae; Cyprinodontiformes; Nothobranchiidae; Nothobranchius
Ailuropoda melanoleuca	Ailmel	9646	Mammals	Carnivora	Laurasiatheria	98.76	0.04	100	0	RefSeq_GCF_000004335.2;Ensembl_92	Vertebrata; Euteleostomi; Mammalia; Eutheria; Laurasiatheria; Carnivora; Caniformia; Ursidae; Ailuropoda
Cricetulus griseus	Crigri	10029	Mammals	Myomorpha(Myodonta)	Myomorpha-Castorimorpha clade;Myomorpha-Castorimorpha-Sciuromorpha clade;Rodentia	96.91	0.46	97.42	0.43	RefSeq_GCF_000223135.1;Ensembl_92	Vertebrata; Euteleostomi; Mammalia; Eutheria; Euarchontoglires; Glires; Rodentia; Myomorpha; Muroidea; Cricetidae; Cricetinae; Cricetulus
Anas platyrhynchos	Anapla	8839	Birds	Galloanserae	.	95.48	0.08	93.99	1.29	RefSeq_GCF_000355885.1;Ensembl_92	Vertebrata; Euteleostomi; Archelosauria; Archosauria; Dinosauria; Saurischia; Theropoda; Coelurosauria; Aves; Neognathae; Galloanserae; Anseriformes; Anatidae; Anas
Sarcophilus harrisii	Sarhar	9305	Mammals	Marsupialia	.	97.41	0.58	99.57	0	RefSeq_GCF_000189315.1;Ensembl_92	Vertebrata; Euteleostomi; Mammalia; Metatheria; Dasyuromorphia; Dasyuridae; Sarcophilus
Latimeria chalumnae	Latcha	7897	Fishes	.	.	96.67	0.35	99.57	0	RefSeq_GCF_000225785.1;Ensembl_92	Vertebrata; Euteleostomi; Coelacanthiformes; Coelacanthidae; Latimeria
Mustela putorius furo	Musput	9669	Mammals	Carnivora	Laurasiatheria	99.27	0.31	100	0	RefSeq_GCF_000215625.1;Ensembl_92	Vertebrata; Euteleostomi; Mammalia; Eutheria; Laurasiatheria; Carnivora; Caniformia; Mustelidae; Mustelinae; Mustela
Haplochromis burtoni	Hapbur	8153	Fishes	.	.	99.42	0.19	99.57	0	RefSeq_GCF_000239415.1	Vertebrata; Euteleostomi; Actinopterygii; Neopterygii; Teleostei; Neoteleostei; Acanthomorphata; Ovalentaria; Cichlomorphae; Cichliformes; Cichlidae; African cichlids; Pseudocrenilabrinae; Haplochromini; Haplochromis
Pundamilia nyererei	Punnye	303518	Fishes	.	.	97.8	0.5	97.85	0.86	RefSeq_GCF_000239375.1	Vertebrata; Euteleostomi; Actinopterygii; Neopterygii; Teleostei; Neoteleostei; Acanthomorphata; Ovalentaria; Cichlomorphae; Cichliformes; Cichlidae; African cichlids; Pseudocrenilabrinae; Haplochromini; Pundamilia
Odocoileus virginianus texanus	Odovir	9880	Mammals	Cetartiodactyla	Laurasiatheria	97.37	0.27	96.14	1.29	RefSeq_GCF_002102435.1	Vertebrata; Euteleostomi; Mammalia; Eutheria; Laurasiatheria; Cetartiodactyla; Ruminantia; Pecora; Cervidae; Odocoileinae; Odocoileus
Saimiri boliviensis boliviensis	Saibol	39432	Mammals	Platyrrhini	.	98.41	0.23	98.28	0	RefSeq_GCF_000235385.1;Ensembl_92	Vertebrata; Euteleostomi; Mammalia; Eutheria; Euarchontoglires; Primates; Haplorrhini; Platyrrhini; Cebidae; Saimiriinae; Saimiri
Heterocephalus glaber	Hetgla	10181	Mammals	Hystricognathi	Rodentia	99.46	0	100	0	RefSeq_GCF_000247695.1;Ensembl_92	Vertebrata; Euteleostomi; Mammalia; Eutheria; Euarchontoglires; Glires; Rodentia; Hystricomorpha; Bathyergidae; Heterocephalus
Equus asinus	Equasi	9793	Mammals	Perissodactyla	Laurasiatheria	98.57	0.15	99.14	0.43	RefSeq_GCF_001305755.1	Vertebrata; Euteleostomi; Mammalia; Eutheria; Laurasiatheria; Perissodactyla; Equidae; Equus
Nipponia nippon	Nipnip	128390	Birds	Neoaves	.	96.48	0.7	94.85	1.72	RefSeq_GCF_000708225.1	Vertebrata; Euteleostomi; Archelosauria; Archosauria; Dinosauria; Saurischia; Theropoda; Coelurosauria; Aves; Neognathae; Pelecaniformes; Threskiornithidae; Nipponia
Rhinopithecus roxellana	Rhirox	61622	Mammals	Cercopithecoidea	.	98.92	0.08	98.71	0.43	RefSeq_GCF_000769185.1;Ensembl_92	Vertebrata; Euteleostomi; Mammalia; Eutheria; Euarchontoglires; Primates; Haplorrhini; Catarrhini; Cercopithecidae; Colobinae; Rhinopithecus
Neomonachus schauinslandi	Neosch	29088	Mammals	Carnivora	Laurasiatheria	98.96	0.15	99.14	0.43	RefSeq_GCF_002201575.1	Vertebrata; Euteleostomi; Mammalia; Eutheria; Laurasiatheria; Carnivora; Caniformia; Phocidae; Neomonachus
Amphiprion ocellaris	Ampoce	80972	Fishes	.	.	98.34	0.39	99.14	0	RefSeq_GCF_002776465.1	Vertebrata; Euteleostomi; Actinopterygii; Neopterygii; Teleostei; Neoteleostei; Acanthomorphata; Ovalentaria; Pomacentridae; Amphiprion
Enhydra lutris kenyoni	Enhlut	391180	Mammals	Carnivora	Laurasiatheria	99.92	0.04	100	0	RefSeq_GCF_002288905.1	Vertebrata; Euteleostomi; Mammalia; Eutheria; Laurasiatheria; Carnivora; Caniformia; Mustelidae; Lutrinae; Enhydra
Pogona vitticeps	Pogvit	103695	Reptiles	Toxicofera	.	98.45	0.43	98.28	0	RefSeq_GCF_900067755.1	Vertebrata; Euteleostomi; Lepidosauria; Squamata; Bifurcata; Unidentata; Episquamata; Toxicofera; Iguania; Acrodonta; Agamidae; Amphibolurinae; Pogona
Scleropages formosus	Sclfor	113540	Fishes	.	.	98.26	0.43	99.57	0	RefSeq_GCF_001624265.1	Vertebrata; Euteleostomi; Actinopterygii; Neopterygii; Teleostei; Osteoglossocephala; Osteoglossomorpha; Osteoglossiformes; Osteoglossidae; Scleropages
Rousettus aegyptiacus	Rouaeg	9407	Mammals	Chiroptera	Laurasiatheria	99.11	0.31	98.71	0.86	RefSeq_GCF_001466805.2	Vertebrata; Euteleostomi; Mammalia; Eutheria; Laurasiatheria; Chiroptera; Megachiroptera; Pteropodidae; Pteropodinae; Rousettus
Panthera pardus	Panpar	9691	Mammals	Carnivora	Laurasiatheria	99.73	0.08	99.14	0.86	RefSeq_GCF_001857705.1	Vertebrata; Euteleostomi; Mammalia; Eutheria; Laurasiatheria; Carnivora; Feliformia; Felidae; Pantherinae; Panthera
Bison bison bison	Bisbis	43346	Mammals	Cetartiodactyla	Laurasiatheria	97.29	0.46	99.14	0	RefSeq_GCF_000754665.1	Vertebrata; Euteleostomi; Mammalia; Eutheria; Laurasiatheria; Cetartiodactyla; Ruminantia; Pecora; Bovidae; Bovinae; Bison
Rhinopithecus bieti	Rhibie	61621	Mammals	Cercopithecoidea	.	97.41	0.19	97.85	0.43	RefSeq_GCF_001698545.1;Ensembl_92	Vertebrata; Euteleostomi; Mammalia; Eutheria; Euarchontoglires; Primates; Haplorrhini; Catarrhini; Cercopithecidae; Colobinae; Rhinopithecus
Sinocyclocheilus grahami	Singra	75366	Fishes	.	.	95.59	0.58	95.28	0.86	RefSeq_GCF_001515645.1	Vertebrata; Euteleostomi; Actinopterygii; Neopterygii; Teleostei; Ostariophysi; Cypriniformes; Cyprinidae; Sinocyclocheilus
Castor canadensis	Cascan	51338	Mammals	Castorimorpha	Myomorpha-Castorimorpha clade;Myomorpha-Castorimorpha-Sciuromorpha clade;Rodentia	95.59	0.77	95.71	1.29	RefSeq_GCF_001984765.1	Vertebrata; Euteleostomi; Mammalia; Eutheria; Euarchontoglires; Glires; Rodentia; Castorimorpha; Castoridae; Castor
Pygocentrus nattereri	Pygnat	42514	Fishes	.	.	98.96	0.12	99.57	0	RefSeq_GCF_001682695.1	Vertebrata; Euteleostomi; Actinopterygii; Neopterygii; Teleostei; Ostariophysi; Characiformes; Characoidei; Pygocentrus
Chinchilla lanigera	Chilan	34839	Mammals	Hystricognathi	Rodentia	99.65	0.04	100	0	RefSeq_GCF_000276665.1;Ensembl_92	Vertebrata; Euteleostomi; Mammalia; Eutheria; Euarchontoglires; Glires; Rodentia; Hystricomorpha; Chinchillidae; Chinchilla
Lepisosteus oculatus	Lepocu	7918	Fishes	.	.	97.6	0.73	98.28	0	RefSeq_GCF_000242695.1;Ensembl_92	Vertebrata; Euteleostomi; Actinopterygii; Neopterygii; Holostei; Semionotiformes; Lepisosteidae; Lepisosteus
Pan paniscus	Panpan	9597	Mammals	Hominoidea	.	99.11	0.12	99.14	0	RefSeq_GCF_000258655.2;Ensembl_92	Vertebrata; Euteleostomi; Mammalia; Eutheria; Euarchontoglires; Primates; Haplorrhini; Catarrhini; Hominidae; Pan
Capra hircus	Caphir	9925	Mammals	Cetartiodactyla	Laurasiatheria	99.92	0	100	0	RefSeq_GCF_001704415.1;Ensembl_92	Vertebrata; Euteleostomi; Mammalia; Eutheria; Laurasiatheria; Cetartiodactyla; Ruminantia; Pecora; Bovidae; Caprinae; Capra
Camelus dromedarius	Camdro	9838	Mammals	Cetartiodactyla	Laurasiatheria	98.53	0.35	99.57	0.43	RefSeq_GCF_000767585.1	Vertebrata; Euteleostomi; Mammalia; Eutheria; Laurasiatheria; Cetartiodactyla; Tylopoda; Camelidae; Camelus
Camelus bactrianus	Cambac	9837	Mammals	Cetartiodactyla	Laurasiatheria	98.84	0.12	99.57	0	RefSeq_GCF_000767855.1	Vertebrata; Euteleostomi; Mammalia; Eutheria; Laurasiatheria; Cetartiodactyla; Tylopoda; Camelidae; Camelus
Jaculus jaculus	Jacjac	51337	Mammals	Myomorpha(Myodonta)	Myomorpha-Castorimorpha clade;Myomorpha-Castorimorpha-Sciuromorpha clade;Rodentia	98.07	0.19	98.71	0	RefSeq_GCF_000280705.1;Ensembl_92	Vertebrata; Euteleostomi; Mammalia; Eutheria; Euarchontoglires; Glires; Rodentia; Myomorpha; Dipodoidea; Dipodidae; Dipodinae; Jaculus
Balaenoptera acutorostrata scammoni	Balacu	310752	Mammals	Cetartiodactyla	Laurasiatheria	98.65	0.5	99.14	0.43	RefSeq_GCF_000493695.1	Vertebrata; Euteleostomi; Mammalia; Eutheria; Laurasiatheria; Cetartiodactyla; Cetacea; Mysticeti; Balaenopteridae; Balaenoptera
Xiphophorus maculatus	Xipmac	8083	Fishes	.	.	99.77	0.12	100	0	RefSeq_GCF_002775205.1;Ensembl_92	Vertebrata; Euteleostomi; Actinopterygii; Neopterygii; Teleostei; Neoteleostei; Acanthomorphata; Ovalentaria; Atherinomorphae; Cyprinodontiformes; Poeciliidae; Poeciliinae; Xiphophorus
Panthera tigris altaica	Pantig	74533	Mammals	Carnivora	Laurasiatheria	96.06	0.77	97	0.43	RefSeq_GCF_000464555.1	Vertebrata; Euteleostomi; Mammalia; Eutheria; Laurasiatheria; Carnivora; Feliformia; Felidae; Pantherinae; Panthera
Microtus ochrogaster	Micoch	79684	Mammals	Myomorpha(Myodonta)	Myomorpha-Castorimorpha clade;Myomorpha-Castorimorpha-Sciuromorpha clade;Rodentia	98.53	0.31	98.28	0.43	RefSeq_GCF_000317375.1;Ensembl_92	Vertebrata; Euteleostomi; Mammalia; Eutheria; Euarchontoglires; Glires; Rodentia; Myomorpha; Muroidea; Cricetidae; Arvicolinae; Microtus
Paralichthys olivaceus	Paroli	8255	Fishes	.	.	95.44	0.66	96.14	0.43	RefSeq_GCF_001970005.1	Vertebrata; Euteleostomi; Actinopterygii; Neopterygii; Teleostei; Neoteleostei; Acanthomorphata; Carangaria; Pleuronectiformes; Pleuronectoidei; Paralichthyidae; Paralichthys
Serinus canaria	Sercan	9135	Birds	Neoaves	.	96.48	0.66	98.28	0.43	RefSeq_GCF_000534875.1	Vertebrata; Euteleostomi; Archelosauria; Archosauria; Dinosauria; Saurischia; Theropoda; Coelurosauria; Aves; Neognathae; Passeriformes; Passeroidea; Fringillidae; Carduelinae; Serinus
Peromyscus maniculatus bairdii	Perman	230844	Mammals	Myomorpha(Myodonta)	Myomorpha-Castorimorpha clade;Myomorpha-Castorimorpha-Sciuromorpha clade;Rodentia	99.38	0.08	99.14	0	RefSeq_GCF_000500345.1;Ensembl_92	Vertebrata; Euteleostomi; Mammalia; Eutheria; Euarchontoglires; Glires; Rodentia; Myomorpha; Muroidea; Cricetidae; Neotominae; Peromyscus
Eptesicus fuscus	Eptfus	29078	Mammals	Chiroptera	Laurasiatheria	98.45	0.27	98.71	0.43	RefSeq_GCF_000308155.1	Vertebrata; Euteleostomi; Mammalia; Eutheria; Laurasiatheria; Chiroptera; Microchiroptera; Vespertilionidae; Eptesicus
Cynoglossus semilaevis	Cynsem	244447	Fishes	.	.	98.45	0.85	99.14	0	RefSeq_GCF_000523025.1	Vertebrata; Euteleostomi; Actinopterygii; Neopterygii; Teleostei; Euteleostei; Neoteleostei; Acanthomorpha; Acanthopterygii; Percomorpha; Pleuronectiformes; Soleoidei; Cynoglossidae; Cynoglossinae; Cynoglossus
Octodon degus	Octdeg	10160	Mammals	Hystricognathi	Rodentia	98.49	0.23	96.14	0	RefSeq_GCF_000260255.1;Ensembl_92	Vertebrata; Euteleostomi; Mammalia; Eutheria; Euarchontoglires; Glires; Rodentia; Hystricomorpha; Octodontidae; Octodon
Orycteropus afer afer	Oryafe	1230840	Mammals	Afrotheria	.	97.45	0.5	97.85	0.43	RefSeq_GCF_000298275.1	Vertebrata; Euteleostomi; Mammalia; Eutheria; Afrotheria; Tubulidentata; Orycteropodidae; Orycteropus
Chrysochloris asiatica	Chrasi	185453	Mammals	Afrotheria	.	98.8	0.39	100	0	RefSeq_GCF_000296735.1	Vertebrata; Euteleostomi; Mammalia; Eutheria; Afrotheria; Chrysochloridae; Chrysochlorinae; Chrysochloris
Elephantulus edwardii	Eleedw	28737	Mammals	Afrotheria	.	97.95	0.73	98.28	0.86	RefSeq_GCF_000299155.1	Vertebrata; Euteleostomi; Mammalia; Eutheria; Afrotheria; Macroscelidea; Macroscelididae; Elephantulus
Ficedula albicollis	Ficalb	59894	Birds	Neoaves	.	98.65	0.27	99.14	0	RefSeq_GCF_000247815.1;Ensembl_92	Vertebrata; Euteleostomi; Archelosauria; Archosauria; Dinosauria; Saurischia; Theropoda; Coelurosauria; Aves; Neognathae; Passeriformes; Muscicapidae; Ficedula
Camelus ferus	Camfer	419612	Mammals	Cetartiodactyla	Laurasiatheria	96.52	0.31	97.42	0.43	RefSeq_GCF_000311805.1	Vertebrata; Euteleostomi; Mammalia; Eutheria; Laurasiatheria; Cetartiodactyla; Tylopoda; Camelidae; Camelus
Mesocricetus auratus	Mesaur	10036	Mammals	Myomorpha(Myodonta)	Myomorpha-Castorimorpha clade;Myomorpha-Castorimorpha-Sciuromorpha clade;Rodentia	98.3	0.5	98.28	1.29	RefSeq_GCF_000349665.1;Ensembl_92	Vertebrata; Euteleostomi; Mammalia; Eutheria; Euarchontoglires; Glires; Rodentia; Myomorpha; Muroidea; Cricetidae; Cricetinae; Mesocricetus
Pteropus alecto	Pteale	9402	Mammals	Chiroptera	Laurasiatheria	98.65	0.35	99.14	0.86	RefSeq_GCF_000325575.1	Vertebrata; Euteleostomi; Mammalia; Eutheria; Laurasiatheria; Chiroptera; Megachiroptera; Pteropodidae; Pteropodinae; Pteropus
Chrysemys picta bellii	Chrpic	8478	Reptiles	Testudines	.	98.69	0.19	97	0.86	RefSeq_GCF_000241765.3	Vertebrata; Euteleostomi; Testudines + Archosauria group; Testudines; Cryptodira; Testudinoidea; Emydidae; Chrysemys
Seriola lalandi dorsalis	Serlal	1841481	Fishes	.	.	99.34	0.04	99.57	0	RefSeq_GCF_002814215.1	Vertebrata; Euteleostomi; Actinopterygii; Neopterygii; Teleostei; Neoteleostei; Acanthomorphata; Carangaria; Carangiformes; Carangidae; Seriola
Seriola dumerili	Serdum	41447	Fishes	.	.	99.65	0.08	99.57	0.43	RefSeq_GCF_002260705.1	Vertebrata; Euteleostomi; Actinopterygii; Neopterygii; Teleostei; Neoteleostei; Acanthomorphata; Carangaria; Carangiformes; Carangidae; Seriola
Nannospalax galili	Nangal	1026970	Mammals	Myomorpha(Myodonta)	Myomorpha-Castorimorpha clade;Myomorpha-Castorimorpha-Sciuromorpha clade;Rodentia	99.23	0.23	99.14	0.86	RefSeq_GCF_000622305.1;Ensembl_92	Vertebrata; Euteleostomi; Mammalia; Eutheria; Euarchontoglires; Glires; Rodentia; Myomorpha; Muroidea; Spalacidae; Spalacinae; Nannospalax
Parus major	Parmaj	9157	Birds	Neoaves	.	98.84	0.43	99.14	0	RefSeq_GCF_001522545.2	Vertebrata; Euteleostomi; Archelosauria; Archosauria; Dinosauria; Saurischia; Theropoda; Coelurosauria; Aves; Neognathae; Passeriformes; Paridae; Parus
Oryzias melastigma	Orymel	30732	Fishes	.	.	99.38	0.43	99.57	0.43	RefSeq_GCF_002922805.1	Vertebrata; Euteleostomi; Actinopterygii; Neopterygii; Teleostei; Neoteleostei; Acanthomorphata; Ovalentaria; Atherinomorphae; Beloniformes; Adrianichthyidae; Oryziinae; Oryzias
Tupaia chinensis	Tupchi	246437	Mammals	.	.	99.27	0.15	99.57	0.43	RefSeq_GCF_000334495.1	Vertebrata; Euteleostomi; Mammalia; Eutheria; Euarchontoglires; Scandentia; Tupaiidae; Tupaia
Physeter catodon	Phycat	9755	Mammals	Cetartiodactyla	Laurasiatheria	99.65	0.04	99.57	0	RefSeq_GCF_002837175.1	Vertebrata; Euteleostomi; Mammalia; Eutheria; Laurasiatheria; Cetartiodactyla; Cetacea; Odontoceti; Physeteridae; Physeter
Poecilia formosa	Poefor	48698	Fishes	.	.	99.15	0.23	100	0	RefSeq_GCF_000485575.1;Ensembl_92	Vertebrata; Euteleostomi; Actinopterygii; Neopterygii; Teleostei; Neoteleostei; Acanthomorphata; Ovalentaria; Atherinomorphae; Cyprinodontiformes; Poeciliidae; Poeciliinae; Poecilia
Astyanax mexicanus	Astmex	7994	Fishes	.	.	99.11	0.31	99.14	0.43	RefSeq_GCF_000372685.2;Ensembl_92	Vertebrata; Euteleostomi; Actinopterygii; Neopterygii; Teleostei; Ostariophysi; Characiformes; Characoidei; Characidae; Characidae incertae sedis; Astyanax clade; Astyanax
Stegastes partitus	Stepar	144197	Fishes	.	.	98.76	0.12	98.28	0	RefSeq_GCF_000690725.1	Vertebrata; Euteleostomi; Actinopterygii; Neopterygii; Teleostei; Neoteleostei; Acanthomorphata; Ovalentaria; Pomacentridae; Stegastes
Cyprinodon variegatus	Cypvar	28743	Fishes	.	.	96.48	0.93	96.57	0.86	RefSeq_GCF_000732505.1	Vertebrata; Euteleostomi; Actinopterygii; Neopterygii; Teleostei; Neoteleostei; Acanthomorphata; Ovalentaria; Atherinomorphae; Cyprinodontiformes; Cyprinodontidae; Cyprinodon
Chlorocebus sabaeus	Chlsab	60711	Mammals	Cercopithecoidea	.	99.27	0.12	99.57	0.43	RefSeq_GCF_000409795.2;Ensembl_92	Vertebrata; Euteleostomi; Mammalia; Eutheria; Euarchontoglires; Primates; Haplorrhini; Catarrhini; Cercopithecidae; Cercopithecinae; Chlorocebus
Austrofundulus limnaeus	Auslim	52670	Fishes	.	.	98.22	0.62	98.71	0.86	RefSeq_GCF_001266775.1	Vertebrata; Euteleostomi; Actinopterygii; Neopterygii; Teleostei; Neoteleostei; Acanthomorphata; Ovalentaria; Atherinomorphae; Cyprinodontiformes; Rivulidae; Austrofundulus
Delphinapterus leucas	Delleu	9749	Mammals	Cetartiodactyla	Laurasiatheria	99.42	0.23	98.28	1.29	RefSeq_GCF_002288925.1	Vertebrata; Euteleostomi; Mammalia; Eutheria; Laurasiatheria; Cetartiodactyla; Cetacea; Odontoceti; Monodontidae; Delphinapterus
Macaca nemestrina	Macnem	9545	Mammals	Cercopithecoidea	.	99.46	0.15	99.14	0.43	RefSeq_GCF_000956065.1;Ensembl_92	Vertebrata; Euteleostomi; Mammalia; Eutheria; Euarchontoglires; Primates; Haplorrhini; Catarrhini; Cercopithecidae; Cercopithecinae; Macaca
Cercocebus atys	Ceraty	9531	Mammals	Cercopithecoidea	.	99.42	0.08	98.71	0.43	RefSeq_GCF_000955945.1;Ensembl_92	Vertebrata; Euteleostomi; Mammalia; Eutheria; Euarchontoglires; Primates; Haplorrhini; Catarrhini; Cercopithecidae; Cercopithecinae; Cercocebus
Chelonia mydas	Chemyd	8469	Reptiles	Testudines	.	97.06	0.39	97.42	0	RefSeq_GCF_000344595.1	Vertebrata; Euteleostomi; Archelosauria; Testudines; Cryptodira; Durocryptodira; Americhelydia; Chelonioidea; Cheloniidae; Chelonia
Alligator mississippiensis	Allmis	8496	Reptiles	Crocodilia	.	98.69	0.46	98.71	0.43	RefSeq_GCF_000281125.3	Vertebrata; Euteleostomi; Archelosauria; Archosauria; Crocodylia; Alligatoridae; Alligatorinae; Alligator
Crocodylus porosus	Cropor	8502	Reptiles	Crocodilia	.	96.79	2.13	96.14	2.15	RefSeq_GCF_001723895.1	Vertebrata; Euteleostomi; Archelosauria; Archosauria; Crocodylia; Longirostres; Crocodylidae; Crocodylus
Odobenus rosmarus divergens	Odoros	9708	Mammals	Carnivora	Laurasiatheria	99.34	0.12	99.14	0.43	RefSeq_GCF_000321225.1	Vertebrata; Euteleostomi; Mammalia; Eutheria; Laurasiatheria; Carnivora; Caniformia; Odobenidae; Odobenus
Orcinus orca	Orcorc	9733	Mammals	Cetartiodactyla	Laurasiatheria	99.42	0.08	100	0	RefSeq_GCF_000331955.2	Vertebrata; Euteleostomi; Mammalia; Eutheria; Laurasiatheria; Cetartiodactyla; Cetacea; Odontoceti; Delphinidae; Orcinus
Numida meleagris	Nummel	8996	Birds	Galloanserae	.	99.3	0.31	99.57	0	RefSeq_GCF_002078875.1	Vertebrata; Euteleostomi; Archelosauria; Archosauria; Dinosauria; Saurischia; Theropoda; Coelurosauria; Aves; Neognathae; Galloanserae; Galliformes; Numididae; Numida
Falco cherrug	Falche	345164	Birds	Neoaves	.	95.63	0.62	97.42	0	RefSeq_GCF_000337975.1	Vertebrata; Euteleostomi; Archelosauria; Archosauria; Dinosauria; Saurischia; Theropoda; Coelurosauria; Aves; Neognathae; Falconiformes; Falconidae; Falco
Lates calcarifer	Latcal	8187	Fishes	.	.	99.77	0.04	99.57	0	RefSeq_GCF_001640805.1	Vertebrata; Euteleostomi; Actinopterygii; Neopterygii; Teleostei; Neoteleostei; Acanthomorphata; Carangaria; Carangaria incertae sedis; Centropomidae; Lates
Aotus nancymaae	Aotnan	37293	Mammals	Platyrrhini	.	99.11	0.04	100	0	RefSeq_GCF_000952055.2;Ensembl_92	Vertebrata; Euteleostomi; Mammalia; Eutheria; Euarchontoglires; Primates; Haplorrhini; Platyrrhini; Aotidae; Aotus
Pelodiscus sinensis	Pelsin	13735	Reptiles	Testudines	.	97.76	0.46	99.57	0.43	RefSeq_GCF_000230535.1;Ensembl_92	Vertebrata; Euteleostomi; Archelosauria; Testudines; Cryptodira; Trionychia; Trionychidae; Pelodiscus
Myotis davidii	Myodav	225400	Mammals	Chiroptera	Laurasiatheria	95.36	0.7	97.85	0	RefSeq_GCF_000327345.1	Vertebrata; Euteleostomi; Mammalia; Eutheria; Laurasiatheria; Chiroptera; Microchiroptera; Vespertilionidae; Myotis
Poecilia mexicana	Poemex	48701	Fishes	.	.	98.18	0.31	99.14	0.43	RefSeq_GCF_001443325.1	Vertebrata; Euteleostomi; Actinopterygii; Neopterygii; Teleostei; Neoteleostei; Acanthomorphata; Ovalentaria; Atherinomorphae; Cyprinodontiformes; Poeciliidae; Poeciliinae; Poecilia
Gavialis gangeticus	Gavgan	94835	Reptiles	Crocodilia	.	96.44	2.67	93.99	3.86	RefSeq_GCF_001723915.1	Vertebrata; Euteleostomi; Archelosauria; Archosauria; Crocodylia; Longirostres; Gavialidae; Gavialinae; Gavialis
Lipotes vexillifer	Lipvex	118797	Mammals	Cetartiodactyla	Laurasiatheria	99.27	0.19	99.14	0	RefSeq_GCF_000442215.1	Vertebrata; Euteleostomi; Mammalia; Eutheria; Laurasiatheria; Cetartiodactyla; Cetacea; Odontoceti; Lipotidae; Lipotes
Pseudopodoces humilis	Psehum	181119	Birds	Neoaves	.	99.57	0.15	99.57	0	RefSeq_GCF_000331425.1	Vertebrata; Euteleostomi; Archelosauria; Archosauria; Dinosauria; Saurischia; Theropoda; Coelurosauria; Aves; Neognathae; Passeriformes; Paridae; Pseudopodoces
Clupea harengus	Cluhar	7950	Fishes	.	.	97.91	0.7	96.14	0.43	RefSeq_GCF_000966335.1	Vertebrata; Euteleostomi; Actinopterygii; Neopterygii; Teleostei; Clupei; Clupeiformes; Clupeoidei; Clupeidae; Clupea
Fukomys damarensis	Fukdam	885580	Mammals	Hystricognathi	Rodentia	98.69	0.27	100	0	RefSeq_GCF_000743615.1;Ensembl_92	Vertebrata; Euteleostomi; Mammalia; Eutheria; Euarchontoglires; Glires; Rodentia; Hystricomorpha; Bathyergidae; Fukomys
Ursus maritimus	Ursmar	29073	Mammals	Carnivora	Laurasiatheria	97.25	0.54	98.28	0.86	RefSeq_GCF_000687225.1	Vertebrata; Euteleostomi; Mammalia; Eutheria; Laurasiatheria; Carnivora; Caniformia; Ursidae; Ursus
Poecilia latipinna	Poelat	48699	Fishes	.	.	98.34	0.31	98.28	0	RefSeq_GCF_001443285.1	Vertebrata; Euteleostomi; Actinopterygii; Neopterygii; Teleostei; Neoteleostei; Acanthomorphata; Ovalentaria; Atherinomorphae; Cyprinodontiformes; Poeciliidae; Poeciliinae; Poecilia
Python bivittatus	Pytbiv	176946	Reptiles	Toxicofera	.	93.97	0.85	94.42	0.43	RefSeq_GCF_000186305.1	Vertebrata; Euteleostomi; Lepidosauria; Squamata; Bifurcata; Unidentata; Episquamata; Toxicofera; Serpentes; Henophidia; Pythonidae; Python
Protobothrops mucrosquamatus	Promuc	103944	Reptiles	Toxicofera	.	95.78	1.28	97	0	RefSeq_GCF_001527695.2	Vertebrata; Euteleostomi; Lepidosauria; Squamata; Bifurcata; Unidentata; Episquamata; Toxicofera; Serpentes; Colubroidea; Viperidae; Crotalinae; Protobothrops
Myotis brandtii	Myobra	109478	Mammals	Chiroptera	Laurasiatheria	95.98	0.43	98.71	0.43	RefSeq_GCF_000412655.1	Vertebrata; Euteleostomi; Mammalia; Eutheria; Laurasiatheria; Chiroptera; Microchiroptera; Vespertilionidae; Myotis
Alligator sinensis	Allsin	38654	Reptiles	Crocodilia	.	96.75	0.31	98.28	0	RefSeq_GCF_000455745.1	Vertebrata; Euteleostomi; Archelosauria; Archosauria; Crocodylia; Alligatoridae; Alligatorinae; Alligator
Esox lucius	Esoluc	8010	Fishes	.	.	99.19	0.19	99.57	0.43	RefSeq_GCF_000721915.3	Vertebrata; Euteleostomi; Actinopterygii; Neopterygii; Teleostei; Protacanthopterygii; Esociformes; Esocidae; Esox
Bos mutus	Bosmut	72004	Mammals	Cetartiodactyla	Laurasiatheria	97.25	0.19	98.71	0	RefSeq_GCF_000298355.1	Vertebrata; Euteleostomi; Mammalia; Eutheria; Laurasiatheria; Cetartiodactyla; Ruminantia; Pecora; Bovidae; Bovinae; Bos
Kryptolebias marmoratus	Krymar	37003	Fishes	.	.	98.07	0.39	97.42	1.29	RefSeq_GCF_001649575.1	Vertebrata; Euteleostomi; Actinopterygii; Neopterygii; Teleostei; Neoteleostei; Acanthomorphata; Ovalentaria; Atherinomorphae; Cyprinodontiformes; Rivulidae; Kryptolebias
Phascolarctos cinereus	Phacin	38626	Mammals	Marsupialia	.	99.85	0.08	100	0	RefSeq_GCF_002099425.1	Vertebrata; Euteleostomi; Mammalia; Metatheria; Diprotodontia; Phascolarctidae; Phascolarctos
Meriones unguiculatus	Merung	10047	Mammals	Myomorpha(Myodonta)	Myomorpha-Castorimorpha clade;Myomorpha-Castorimorpha-Sciuromorpha clade;Rodentia	96.09	0.73	96.57	0	RefSeq_GCF_002204375.1	Vertebrata; Euteleostomi; Mammalia; Eutheria; Euarchontoglires; Glires; Rodentia; Myomorpha; Muroidea; Muridae; Gerbillinae; Meriones
Monopterus albus	Monalb	43700	Fishes	.	.	98.34	0.66	98.28	0.43	RefSeq_GCF_001952655.1	Vertebrata; Euteleostomi; Actinopterygii; Neopterygii; Teleostei; Neoteleostei; Acanthomorphata; Anabantaria; Synbranchiformes; Synbranchidae; Monopterus
Propithecus coquereli	Procoq	379532	Mammals	Strepsirhini	.	95.78	0.23	95.28	0.43	RefSeq_GCF_000956105.1;Ensembl_92	Vertebrata; Euteleostomi; Mammalia; Eutheria; Euarchontoglires; Primates; Strepsirrhini; Lemuriformes; Indriidae; Propithecus
Trichechus manatus latirostris	Triman	127582	Mammals	Afrotheria	.	97.76	0.39	99.14	0.43	RefSeq_GCF_000243295.1	Vertebrata; Euteleostomi; Mammalia; Eutheria; Afrotheria; Sirenia; Trichechidae; Trichechus
Ceratotherium simum simum	Cersim	73337	Mammals	Perissodactyla	Laurasiatheria	99.27	0.23	99.14	0.86	RefSeq_GCF_000283155.1	Vertebrata; Euteleostomi; Mammalia; Eutheria; Laurasiatheria; Perissodactyla; Rhinocerotidae; Ceratotherium
Anser cygnoides domesticus	Anscyg	381198	Birds	Galloanserae	.	94.2	0.81	95.71	1.29	RefSeq_GCF_000971095.1	Vertebrata; Euteleostomi; Archelosauria; Archosauria; Dinosauria; Saurischia; Theropoda; Coelurosauria; Aves; Neognathae; Galloanserae; Anseriformes; Anatidae; Anser
Egretta garzetta	Egrgar	188379	Birds	Neoaves	.	95.48	0.5	97	0.86	RefSeq_GCF_000687185.1	Vertebrata; Euteleostomi; Archelosauria; Archosauria; Dinosauria; Saurischia; Theropoda; Coelurosauria; Aves; Neognathae; Pelecaniformes; Ardeidae; Egretta
Equus przewalskii	Equprz	9798	Mammals	Perissodactyla	Laurasiatheria	96.56	0.23	93.99	1.72	RefSeq_GCF_000696695.1	Vertebrata; Euteleostomi; Mammalia; Eutheria; Laurasiatheria; Perissodactyla; Equidae; Equus
Manacus vitellinus	Manvit	328815	Birds	Neoaves	.	96.37	0.73	97.85	0	RefSeq_GCF_001715985.1	Vertebrata; Euteleostomi; Archelosauria; Archosauria; Dinosauria; Saurischia; Theropoda; Coelurosauria; Aves; Neognathae; Passeriformes; Pipridae; Manacus
Corvus brachyrhynchos	Corbra	85066	Birds	Neoaves	.	95.09	0.62	96.14	0.86	RefSeq_GCF_000691975.1	Vertebrata; Euteleostomi; Archelosauria; Archosauria; Dinosauria; Saurischia; Theropoda; Coelurosauria; Aves; Neognathae; Passeriformes; Corvoidea; Corvidae; Corvus
Aquila chrysaetos canadensis	Aquchr	216574	Birds	Neoaves	.	99.3	0.12	97	0.86	RefSeq_GCF_000766835.1	Vertebrata; Euteleostomi; Archelosauria; Archosauria; Dinosauria; Saurischia; Theropoda; Coelurosauria; Aves; Neognathae; Falconiformes; Accipitridae; Accipitrinae; Aquila
Calypte anna	Calann	9244	Birds	Neoaves	.	96.44	0.66	97	0	RefSeq_GCF_000699085.1	Vertebrata; Euteleostomi; Archelosauria; Archosauria; Dinosauria; Saurischia; Theropoda; Coelurosauria; Aves; Neognathae; Trochiliformes; Trochilidae; Calypte
Aptenodytes forsteri	Aptfor	9233	Birds	Neoaves	.	95.82	0.54	95.71	0.86	RefSeq_GCF_000699145.1	Vertebrata; Euteleostomi; Archelosauria; Archosauria; Dinosauria; Saurischia; Theropoda; Coelurosauria; Aves; Neognathae; Sphenisciformes; Spheniscidae; Aptenodytes
Charadrius vociferus	Chavoc	50402	Birds	Neoaves	.	96.37	0.5	95.28	0.86	RefSeq_GCF_000708025.1	Vertebrata; Euteleostomi; Archelosauria; Archosauria; Dinosauria; Saurischia; Theropoda; Coelurosauria; Aves; Neognathae; Charadriiformes; Charadriidae; Charadrius
Cuculus canorus	Cuccan	55661	Birds	Neoaves	.	97.33	0.7	98.71	0	RefSeq_GCF_000709325.1	Vertebrata; Euteleostomi; Archelosauria; Archosauria; Dinosauria; Saurischia; Theropoda; Coelurosauria; Aves; Neognathae; Cuculiformes; Cuculidae; Cuculus
Haliaeetus leucocephalus	Halleu	52644	Birds	Neoaves	.	98.34	0.58	96.14	2.58	RefSeq_GCF_000737465.1	Vertebrata; Euteleostomi; Archelosauria; Archosauria; Dinosauria; Saurischia; Theropoda; Coelurosauria; Aves; Neognathae; Falconiformes; Accipitridae; Accipitrinae; Haliaeetus
Chaetura pelagica	Chapel	8897	Birds	Neoaves	.	95.36	0.7	97	0.43	RefSeq_GCF_000747805.1	Vertebrata; Euteleostomi; Archelosauria; Archosauria; Dinosauria; Saurischia; Theropoda; Coelurosauria; Aves; Neognathae; Apodiformes; Apodidae; Chaetura
Mus caroli	Muscar	10089	Mammals	Myomorpha(Myodonta)	Myomorpha-Castorimorpha clade;Myomorpha-Castorimorpha-Sciuromorpha clade;Rodentia	99.3	0.27	99.14	0	RefSeq_GCF_900094665.1;Ensembl_92	Vertebrata; Euteleostomi; Mammalia; Eutheria; Euarchontoglires; Glires; Rodentia; Myomorpha; Muroidea; Muridae; Murinae; Mus; Mus
Nanorana parkeri	Nanpar	125878	Amphibians	.	.	95.24	2.09	97.42	0	RefSeq_GCF_000935625.1	Vertebrata; Euteleostomi; Amphibia; Batrachia; Anura; Neobatrachia; Ranoidea; Dicroglossidae; Dicroglossinae; Nanorana
Marmota marmota marmota	Marmar	9994	Mammals	Sciuromorpha	Myomorpha-Castorimorpha-Sciuromorpha clade;Rodentia	97.56	0.23	97.42	0	RefSeq_GCF_001458135.1	Vertebrata; Euteleostomi; Mammalia; Eutheria; Euarchontoglires; Glires; Rodentia; Sciuromorpha; Sciuridae; Xerinae; Marmotini; Marmota
Mandrillus leucophaeus	Manleu	9568	Mammals	Cercopithecoidea	.	97.8	0.23	97.85	0	RefSeq_GCF_000951045.1;Ensembl_92	Vertebrata; Euteleostomi; Mammalia; Eutheria; Euarchontoglires; Primates; Haplorrhini; Catarrhini; Cercopithecidae; Cercopithecinae; Mandrillus
Colobus angolensis palliatus	Colang	336983	Mammals	Cercopithecoidea	.	97.87	0.15	98.71	0.43	RefSeq_GCF_000951035.1;Ensembl_92	Vertebrata; Euteleostomi; Mammalia; Eutheria; Euarchontoglires; Primates; Haplorrhini; Catarrhini; Cercopithecidae; Colobinae; Colobus
Manis javanica	Manjav	9974	Mammals	.	.	91.96	0.7	91.85	1.29	RefSeq_GCF_001685135.1	Vertebrata; Euteleostomi; Mammalia; Eutheria; Laurasiatheria; Pholidota; Manidae; Manis
Sinocyclocheilus rhinocerous	Sinrhi	307959	Fishes	.	.	97.53	0.46	99.57	0.43	RefSeq_GCF_001515625.1	Vertebrata; Euteleostomi; Actinopterygii; Neopterygii; Teleostei; Ostariophysi; Cypriniformes; Cyprinidae; Sinocyclocheilus
Sinocyclocheilus anshuiensis	Sinans	1608454	Fishes	.	.	98.34	0.39	99.57	0.43	RefSeq_GCF_001515605.1	Vertebrata; Euteleostomi; Actinopterygii; Neopterygii; Teleostei; Ostariophysi; Cypriniformes; Cyprinidae; Sinocyclocheilus
Gekko japonicus	Gekjap	146911	Reptiles	Gekkota	.	94.86	0.93	95.28	0.43	RefSeq_GCF_001447785.1	Vertebrata; Euteleostomi; Lepidosauria; Squamata; Bifurcata; Gekkota; Gekkonidae; Gekkoninae; Gekko
Calidris pugnax	Calpug	198806	Birds	Neoaves	.	98.53	0.23	98.28	0	RefSeq_GCF_001431845.1	Vertebrata; Euteleostomi; Archelosauria; Archosauria; Dinosauria; Saurischia; Theropoda; Coelurosauria; Aves; Neognathae; Charadriiformes; Scolopacidae; Calidris
Sturnus vulgaris	Stuvul	9172	Birds	Neoaves	.	99.3	0.19	99.57	0.43	RefSeq_GCF_001447265.1	Vertebrata; Euteleostomi; Archelosauria; Archosauria; Dinosauria; Saurischia; Theropoda; Coelurosauria; Aves; Neognathae; Passeriformes; Sturnidae; Sturnus
Lonchura striata domestica	Lonstr	299123	Birds	Neoaves	.	98.76	0.5	100	0	RefSeq_GCF_002197715.1	Vertebrata; Euteleostomi; Archelosauria; Archosauria; Dinosauria; Saurischia; Theropoda; Coelurosauria; Aves; Neognathae; Passeriformes; Passeroidea; Estrildidae; Estrildinae; Lonchura
Miniopterus natalensis	Minnat	291302	Mammals	Chiroptera	Laurasiatheria	98.3	0.23	99.14	0.43	RefSeq_GCF_001595765.1	Vertebrata; Euteleostomi; Mammalia; Eutheria; Laurasiatheria; Chiroptera; Microchiroptera; Vespertilionidae; Miniopterinae; Miniopterus
Lepidothrix coronata	Lepcor	321398	Birds	Neoaves	.	98.38	0.46	97.42	0.86	RefSeq_GCF_001604755.1	Vertebrata; Euteleostomi; Archelosauria; Archosauria; Dinosauria; Saurischia; Theropoda; Coelurosauria; Aves; Neognathae; Passeriformes; Pipridae; Lepidothrix
Cebus capucinus imitator	Cebcap	1737458	Mammals	Platyrrhini	.	98.49	0.08	98.71	0	RefSeq_GCF_001604975.1;Ensembl_92	Vertebrata; Euteleostomi; Mammalia; Eutheria; Euarchontoglires; Primates; Haplorrhini; Platyrrhini; Cebidae; Cebinae; Cebus
Carlito syrichta	Carsyr	1868482	Mammals	.	.	95.71	0.43	97.85	0.43	RefSeq_GCF_000164805.1;Ensembl_92	Vertebrata; Euteleostomi; Mammalia; Eutheria; Euarchontoglires; Primates; Haplorrhini; Tarsiiformes; Tarsiidae; Carlito
Rhinolophus sinicus	Rhisin	89399	Mammals	Chiroptera	Laurasiatheria	99.11	0.23	99.57	0	RefSeq_GCF_001888835.1	Vertebrata; Euteleostomi; Mammalia; Eutheria; Laurasiatheria; Chiroptera; Microchiroptera; Rhinolophidae; Rhinolophinae; Rhinolophus
Mus pahari	Muspah	10093	Mammals	Myomorpha(Myodonta)	Myomorpha-Castorimorpha clade;Myomorpha-Castorimorpha-Sciuromorpha clade;Rodentia	99.15	0.43	99.57	0	RefSeq_GCF_900095145.1;Ensembl_92	Vertebrata; Euteleostomi; Mammalia; Eutheria; Euarchontoglires; Glires; Rodentia; Myomorpha; Muroidea; Muridae; Murinae; Mus; Coelomys
Acanthochromis polyacanthus	Acapol	80966	Fishes	.	.	97.29	0.23	97.85	0	RefSeq_GCF_002109545.1	Vertebrata; Euteleostomi; Actinopterygii; Neopterygii; Teleostei; Neoteleostei; Acanthomorphata; Ovalentaria; Pomacentridae; Acanthochromis
Piliocolobus tephrosceles	Piltep	591936	Mammals	Cercopithecoidea	.	97.72	0.23	97.42	0.43	RefSeq_GCF_002776525.1	Vertebrata; Euteleostomi; Mammalia; Eutheria; Euarchontoglires; Primates; Haplorrhini; Catarrhini; Cercopithecidae; Colobinae; Piliocolobus
Paramormyrops kingsleyae	Parkin	1676925	Fishes	.	.	98.57	0.39	98.28	0.43	RefSeq_GCF_002872115.1	Vertebrata; Euteleostomi; Actinopterygii; Neopterygii; Teleostei; Osteoglossocephala; Osteoglossomorpha; Osteoglossiformes; Mormyridae; Paramormyrops
Terrapene mexicana triunguis	Termex	1415176	Reptiles	Testudines	.	92.73	0.7	93.99	0.43	RefSeq_GCF_002925995.1	Vertebrata; Euteleostomi; Archelosauria; Testudines; Cryptodira; Durocryptodira; Testudinoidea; Emydidae; Terrapene
Columba livia	Colliv	8932	Birds	Neoaves	.	96.21	0.46	96.14	0.43	RefSeq_GCF_000337935.1	Vertebrata; Euteleostomi; Archelosauria; Archosauria; Dinosauria; Saurischia; Theropoda; Coelurosauria; Aves; Neognathae; Columbiformes; Columbidae; Columba
Pan troglodytes	Pantro	9598	Mammals	Hominoidea	.	99.5	0.08	100	0	RefSeq_GCF_000001515.7;Ensembl_92	Vertebrata; Euteleostomi; Mammalia; Eutheria; Euarchontoglires; Primates; Haplorrhini; Catarrhini; Hominidae; Pan
Mus spretus	Musspr	10096	Mammals	Myomorpha(Myodonta)	Myomorpha-Castorimorpha clade;Myomorpha-Castorimorpha-Sciuromorpha clade;Rodentia	98.22	0.97	97.85	1.29	Ensembl_92	Vertebrata; Euteleostomi; Mammalia; Eutheria; Euarchontoglires; Glires; Rodentia; Myomorpha; Muroidea; Muridae; Murinae; Mus; Mus
Rhincodon typus	Rhityp	259920	Chondrichthyans	.	.	93.46	1.31	85.84	2.15	RefSeq_GCF_001642345.1;RIKEN	Vertebrata; Chondrichthyes; Elasmobranchii; Galeomorphii; Galeoidea; Orectolobiformes; Rhincodontidae; Rhincodon
Scyliorhinus torazame	Scytor	75743	Chondrichthyans	.	.	81.44	4.45	87.98	3	RefSeq_GCF_001642345.1;RIKEN	Vertebrata; Chondrichthyes; Elasmobranchii; Galeomorphii; Galeoidea; Carcharhiniformes; Scyliorhinidae; Scyliorhinus
Chiloscyllium punctatum	Chipun	137246	Chondrichthyans	.	.	95.28	0.86	95.28	0.86	RefSeq_GCF_001642345.1;RIKEN	Vertebrata; Chondrichthyes; Elasmobranchii; Galeomorphii; Galeoidea; Orectolobiformes; Hemiscylliidae; Chiloscyllium
Paroedura picta	Parpic	143630	Reptiles	Gekkota	.	89.79	3.25	89.7	1.29	RefSeq_GCF_001642345.1;RIKEN	Vertebrata; Euteleostomi; Lepidosauria; Squamata; Bifurcata; Gekkota; Gekkonidae; Gekkoninae; Paroedura

## Sheet: Table_S3-supplementary_file_1ｂ
Supplementary Table S3. ENCODE accession ID list used for epigenomic analyses
File accession in ENCODE	Alias in UCSC	File format	Output type	File assembly	Assay	Biosample term name
ENCFF544TNR		bed narrowPeak	conservative IDR thresholded peaks	GRCh38	ATAC-seq	GM12878
ENCFF548PSN		bed narrowPeak	conservative IDR thresholded peaks	GRCh38	ATAC-seq	A549
ENCFF305GIG		bed narrowPeak	conservative IDR thresholded peaks	GRCh38	ATAC-seq	K562
ENCFF067WME		bed narrowPeak	conservative IDR thresholded peaks	GRCh38	ATAC-seq	GM23338
ENCFF172DEA		bed narrowPeak	conservative IDR thresholded peaks	GRCh38	ATAC-seq	GM12878
ENCFF356TXH		bed narrowPeak	conservative IDR thresholded peaks	GRCh38	ATAC-seq	HepG2
ENCFF810YIX		bed narrowPeak	conservative IDR thresholded peaks	GRCh38	ATAC-seq	K562
ENCFF715LSI		bed narrowPeak	conservative IDR thresholded peaks	GRCh38	ATAC-seq	HepG2
ENCFF879EZT		bed narrowPeak	conservative IDR thresholded peaks	GRCh38	ATAC-seq	MCF-7
ENCFF483EAG		bed narrowPeak	conservative IDR thresholded peaks	GRCh38	ATAC-seq	IMR-90
ENCFF619DFW		bed narrowPeak	conservative IDR thresholded peaks	GRCh38	ATAC-seq	SK-N-SH
ENCFF067UVH		bed bed3+	topologically associated domains	GRCh38	Hi-C	SK-MEL-5
ENCFF183RCR		bed bed3+	topologically associated domains	GRCh38	Hi-C	T47D
ENCFF654ZID		bed bed3+	topologically associated domains	GRCh38	Hi-C	RPMI7951
ENCFF296RLZ		bed bed3+	topologically associated domains	GRCh38	Hi-C	SJCRH30
ENCFF241RXN		bed bed3+	topologically associated domains	GRCh38	Hi-C	G401
ENCFF822VBC		bed bed3+	topologically associated domains	GRCh38	Hi-C	NCI-H460
ENCFF796ORT		bed bed3+	topologically associated domains	GRCh38	Hi-C	Panc1
ENCFF716CFF		bed bed3+	topologically associated domains	GRCh38	Hi-C	A549
ENCFF302WDA		bed bed3+	topologically associated domains	GRCh38	Hi-C	Caki2
ENCFF139JCA		bed bed3+	topologically associated domains	GRCh38	Hi-C	LNCaP clone FGC
ENCFF603GAT		bed bed3+	topologically associated domains	GRCh38	Hi-C	SK-N-MC
ENCFF001GHZ	wgEncodeUwRepliSeqBg02esWaveSignalRep1	bigWig	wavelet-smoothed signal	hg19	RepliSeq	BG02ES
ENCFF001GJQ	wgEncodeUwRepliSeqBjWaveSignalRep1	bigWig	wavelet-smoothed signal	hg19	RepliSeq	BJ
ENCFF001GKV	wgEncodeUwRepliSeqGm06990WaveSignalRep1	bigWig	wavelet-smoothed signal	hg19	RepliSeq	GM06990
ENCFF001GLQ	wgEncodeUwRepliSeqGm12801WaveSignalRep1	bigWig	wavelet-smoothed signal	hg19	RepliSeq	GM12801
ENCFF001GMM	wgEncodeUwRepliSeqGm12812WaveSignalRep1	bigWig	wavelet-smoothed signal	hg19	RepliSeq	GM12812
ENCFF001GNI	wgEncodeUwRepliSeqGm12813WaveSignalRep1	bigWig	wavelet-smoothed signal	hg19	RepliSeq	GM12813
ENCFF001GOE	wgEncodeUwRepliSeqGm12878WaveSignalRep1	bigWig	wavelet-smoothed signal	hg19	RepliSeq	GM12878
ENCFF001GPB	wgEncodeUwRepliSeqHelas3WaveSignalRep1	bigWig	wavelet-smoothed signal	hg19	RepliSeq	HeLa-S3
ENCFF001GQD	wgEncodeUwRepliSeqHepg2WaveSignalRep1	bigWig	wavelet-smoothed signal	hg19	RepliSeq	HepG2
ENCFF001GQX	wgEncodeUwRepliSeqHuvecWaveSignalRep1	bigWig	wavelet-smoothed signal	hg19	RepliSeq	HUVEC
ENCFF001GRV	wgEncodeUwRepliSeqImr90WaveSignalRep1	bigWig	wavelet-smoothed signal	hg19	RepliSeq	IMR90
ENCFF001GST	wgEncodeUwRepliSeqK562WaveSignalRep1	bigWig	wavelet-smoothed signal	hg19	RepliSeq	K562
ENCFF001GTQ	wgEncodeUwRepliSeqMcf7WaveSignalRep1	bigWig	wavelet-smoothed signal	hg19	RepliSeq	MCF-7
ENCFF001GUN	wgEncodeUwRepliSeqNhekWaveSignalRep1	bigWig	wavelet-smoothed signal	hg19	RepliSeq	NHEK
ENCFF001GVH	wgEncodeUwRepliSeqSknshWaveSignalRep1	bigWig	wavelet-smoothed signal	hg19	RepliSeq	SK-N-SH

## Sheet: Table_S4-supplementary_file_1c
Supplementary Table S4. RNA-seq and ATAC-seq samples of non-mammalian vertebrates
Species	Experiment	Processed data	SRA Library/GEO Sample ID	Tissue	Stage*	Genome assembly for ATAC-seq peak call
Gallus gallus	RNA-seq	TPM value by Bgee	SRX997083	spermatocyte	post-juvenile
Gallus gallus	RNA-seq	TPM value by Bgee	SRX997087	spermatid	post-juvenile
Gallus gallus	RNA-seq	TPM value by Bgee	SRX2745134	granulocyte	juvenile stage
Gallus gallus	RNA-seq	TPM value by Bgee	SRX217703	testis	post-juvenile
Gallus gallus	RNA-seq	TPM value by Bgee	SRX2506223	heart	young adult stage (chicken)
Gallus gallus	RNA-seq	TPM value by Bgee	SRX081870	brain	1-year-old stage (chicken)
Gallus gallus	RNA-seq	TPM value by Bgee	SRX328086	ovary	post-juvenile
Gallus gallus	RNA-seq	TPM value by Bgee	SRX196386	skeletal muscle tissue	post-juvenile
Gallus gallus	RNA-seq	TPM value by Bgee	SRX196372	colon	post-juvenile
Gallus gallus	RNA-seq	TPM value by Bgee	SRX081872	cerebellum	1-year-old stage (chicken)
Gallus gallus	RNA-seq	TPM value by Bgee	SRX2506227	lung	young adult stage (chicken)
Gallus gallus	RNA-seq	TPM value by Bgee	SRX2506292	spleen	young adult stage (chicken)
Gallus gallus	RNA-seq	TPM value by Bgee	SRX196375	liver	post-juvenile
Gallus gallus	RNA-seq	TPM value by Bgee	SRX196374	kidney	post-juvenile
Gallus gallus	RNA-seq	TPM value by Bgee	SRX2506252	muscle tissue	young adult stage (chicken)
Anolis carolinensis	RNA-seq	TPM value by Bgee	SRX2711639	testis	post-juvenile
Anolis carolinensis	RNA-seq	TPM value by Bgee	SRX111452	heart	life cycle**
Anolis carolinensis	RNA-seq	TPM value by Bgee	SRX111454	brain	life cycle**
Anolis carolinensis	RNA-seq	TPM value by Bgee	SRX111453	ovary	life cycle**
Anolis carolinensis	RNA-seq	TPM value by Bgee	SRX112550	skeletal muscle tissue	life cycle**
Anolis carolinensis	RNA-seq	TPM value by Bgee	SRX112552	lung	life cycle**
Anolis carolinensis	RNA-seq	TPM value by Bgee	SRX112551	liver	life cycle**
Anolis carolinensis	RNA-seq	TPM value by Bgee	SRX191161	kidney	post-juvenile
Anolis carolinensis	RNA-seq	TPM value by Bgee	SRX146889	adrenal gland	life cycle**
Anolis carolinensis	RNA-seq	TPM value by Bgee	SRX679302	forelimb bud	embryo stage
Anolis carolinensis	RNA-seq	TPM value by Bgee	SRX679292	hindlimb bud	embryo stage
Anolis carolinensis	RNA-seq	TPM value by Bgee	SRX679300	embryonic post-anal tail	embryo stage
Anolis carolinensis	RNA-seq	TPM value by Bgee	SRX679298	hemipenis	embryo stage
Anolis carolinensis	RNA-seq	TPM value by Bgee	SRX111451	dewlap	life cycle**
Xenopus tropicalis	RNA-seq	TPM value by Bgee	SRX218739	egg cell	post-juvenile
Xenopus tropicalis	RNA-seq	TPM value by Bgee	SRX191166	mesonephros	post-juvenile
Xenopus tropicalis	RNA-seq	TPM value by Bgee	SRX218735	blastula	NF stage 9 (Xenopus)
Xenopus tropicalis	RNA-seq	TPM value by Bgee	SRX143555	multicellular organism	life cycle**
Xenopus tropicalis	RNA-seq	TPM value by Bgee	SRX328088	testis	post-juvenile
Xenopus tropicalis	RNA-seq	TPM value by Bgee	SRX191167	heart	post-juvenile
Xenopus tropicalis	RNA-seq	TPM value by Bgee	SRX217705	brain	post-juvenile
Xenopus tropicalis	RNA-seq	TPM value by Bgee	SRX217713	ovary	post-juvenile
Xenopus tropicalis	RNA-seq	TPM value by Bgee	SRX191168	skeletal muscle tissue	post-juvenile
Xenopus tropicalis	RNA-seq	TPM value by Bgee	SRX217711	liver	post-juvenile
Xenopus tropicalis	RNA-seq	TPM value by Bgee	SRX143545	neurula embryo	neurula stage
Xenopus tropicalis	RNA-seq	TPM value by Bgee	SRX143519	gastrula	gastrula stage
Xenopus tropicalis	RNA-seq	TPM value by Bgee	SRX870977	early embryo	8 cell stage
Xenopus tropicalis	RNA-seq	TPM value by Bgee	SRX870958	2-cell stage embryo	2 cell stage
Xenopus tropicalis	RNA-seq	TPM value by Bgee	SRX870969	4-cell stage embryo	4 cell stage
Latimeria chalumnae	RNA-seq	TPM value by Bgee	DRX001719	mesonephros	life cycle**
Latimeria chalumnae	RNA-seq	TPM value by Bgee	DRX001721	pectoral fin	life cycle**
Latimeria chalumnae	RNA-seq	TPM value by Bgee	DRX001720	pelvic fin	life cycle**
Latimeria chalumnae	RNA-seq	TPM value by Bgee	DRX001723	pharyngeal gill	life cycle**
Latimeria chalumnae	RNA-seq	TPM value by Bgee	DRX001722	chordate pharynx	life cycle**
Latimeria chalumnae	RNA-seq	TPM value by Bgee	SRX112771	muscle tissue	life cycle**
Latimeria chalumnae	RNA-seq	TPM value by Bgee	DRX001724	post-anal tail muscle	life cycle**
Lepisosteus oculatus	RNA-seq	TPM value by Bgee	SRX543560	zone of skin	sexually immature stage
Lepisosteus oculatus	RNA-seq	TPM value by Bgee	SRX543385	camera-type eye	sexually immature stage
Lepisosteus oculatus	RNA-seq	TPM value by Bgee	SRX543517	mesonephros	sexually immature stage
Lepisosteus oculatus	RNA-seq	TPM value by Bgee	SRX661022	intestine	post-juvenile
Lepisosteus oculatus	RNA-seq	TPM value by Bgee	SRX661016	pharyngeal gill	post-juvenile
Lepisosteus oculatus	RNA-seq	TPM value by Bgee	SRX543514	testis	post-juvenile
Lepisosteus oculatus	RNA-seq	TPM value by Bgee	SRX543532	heart	sexually immature stage
Lepisosteus oculatus	RNA-seq	TPM value by Bgee	SRX661015	brain	post-juvenile
Lepisosteus oculatus	RNA-seq	TPM value by Bgee	SRX661024	ovary	post-juvenile
Lepisosteus oculatus	RNA-seq	TPM value by Bgee	SRX661021	bone element	post-juvenile
Lepisosteus oculatus	RNA-seq	TPM value by Bgee	SRX543376	liver	sexually immature stage
Lepisosteus oculatus	RNA-seq	TPM value by Bgee	SRX543535	muscle tissue	sexually immature stage
Gallus gallus	ATAC-seq	NarrowPeak	GSM4057718	flank somatopleure	HH18	galGal4
Gallus gallus	ATAC-seq	NarrowPeak	GSM4057721	forelimb somatopleure	HH18	galGal4
Gallus gallus	ATAC-seq	NarrowPeak	GSM4057724	hindlimb somatopleure	HH18	galGal4
Gallus gallus	ATAC-seq	NarrowPeak	GSM4588611	retinal cells, ThrbCRM1+	E5	galGal5
Gallus gallus	ATAC-seq	NarrowPeak	GSM4986889	neural crest cells	HH18	galGal6
Gallus gallus	ATAC-seq	NarrowPeak	GSM6152756	tailbud, presomitic mesoderm, and 2-3 somite pairs	HH19	galGal6
Gallus gallus	ATAC-seq	NarrowPeak	GSM6152758	dorsal skin	HH35	galGal6
Gallus gallus	ATAC-seq	NarrowPeak	GSM6152760	telencephalon	HH35	galGal6
* The samples from the Bgee database were staged by referring to the Uber-anatomy ontology (UBERON; http://obophenotype.github.io/uberon/)
** The term 'life cycle' denotes stages not available
